# Supplementary material
Source: publisher site journal article supplement (https://www.dovepress.com/article/488153)
Supplement: Supplementary file 1 [file get_supplementary_file.php]

**Supplementary Materials**

**Association between Systemic Immune-Inflammation Index and stress urinary incontinence in adult women: a population-based study**

Mei Jiang a, #, Xiaodie Yao a, #, Hua Jiang a *

a Department of Gynecology and Obstetrics, Women’s Hospital of Nanjing Medical University, Nanjing Women and Children's Healthcare Hospital, Nanjing, China

⁎ Correspondence to: H. Jiang, Women’s Hospital of Nanjing Medical University, Nanjing Women and Children's Healthcare Hospital, Nanjing, Jiangsu 210004, PR China.

E-mail addresses: jianghua@njmu.edu.cn (H. Jiang).

# Co-first author, contributed to this study equally.

|  |
| --- |
| | **Table S1. Association Between Systemic Immune-Inflammation Index and monthly/weekly SUl.** | | | | | | | | | | --- | --- | --- | --- | --- | --- | --- | --- | --- | |  | OR (95%CI2), p-value | | | | | | | | | **Crude model** | |  | **Minimally adjusted model (Model 2)** | |  | **Fully adjusted model (Model 3)** | | | **(Model 1)** | | | **OR (95% CI)** | ***P*** |  | **OR (95% CI)** | ***P*** |  | **OR (95% CI)** | ***P*** | | **Monthly SUI** |  |  |  |  |  |  |  |  | | **log2SII** | **1.14 (1.06, 1.23)** | **<0.05** |  | **1.15 (1.06, 1.24)** | **<0.05** |  | **1.09 (1.01, 1.19)** | **<0.05** | | **Stratified by log2SII tertiles** |  |  |  |  |  |  |  |  | | Tertile 1 | reference |  |  | reference |  |  | reference |  | | Tertile 2 | **1.37 (1.19, 1.59)** | **<0.05** |  | **1.34 (1.16, 1.56)** | **<0.05** |  | **1.28 (1.10, 1.49)** | **<0.05** | | Tertile 3 | **1.27 (1.10, 1.4**5) | **<0.05** |  | **1.28 (1.10, 1.48)** | **<0.05** |  | **1.18 (1.01, 1.37)** | **<0.05** | | **Weekly SUI** |  |  |  |  |  |  |  |  | | **log2SII** | **1.18 (1.06, 1.31)** | **<0.05** |  | **1.17 (1.05, 1.30)** | **<0.05** |  | 1.08 (0.97, 1.21) | 0.176 | | **Stratified by log2SII tertiles** |  |  |  |  |  |  |  |  | | Tertile 1 | reference |  |  | reference |  |  | reference |  | | Tertile 2 | **1.22 (1.00, 1.48)** | **<0.05** |  | 1.17 (0.95, 1.45) | 0.135 |  | 1.10 (0.88, 1.37) | 0.410 | | Tertile 3 | 1.19 (0.97, 1.46) | 0.099 |  | 1.19 (0.96, 1.46) | 0.113 |  | 1.03 (0.82, 1.29) | 0.785 | | Notes: SUI, stress urinary incontinence. SII was converted from a continuous variable to a categorical variable (tertiles). Model 1 was adjusted for no covariates; Model 2 was adjusted for age, race, education level, PIR, and marital status; Model 3 was adjusted for age, race, marital status, education level, PIR, BMI, waist circumference, smoking status, physical activity, gravidity, vaginal delivery, hypertension, and diabetes. Log2SII, log2-transformed concentration of SII. The use of bold font is to show that the *p*‐value of the statistic is less than 0.05, making it more prominent. | | | | | | | | | |
